# Supplementary material for: Highly stable cage-like complexes by self-assembly of tetracationic Zn(II) porphyrinates and tetrasulfonatocalix[4]arenes in polar solvents
Source: Royal Society of Chemistry journal article supplement (doi:10.1039/b006960o), 2000-01-01
Supplement: b006960o.doc [file b006960o.doc]

# Supplementary data

**Fig. 3** UV-Vis titration of Zn(II)porphyrinate **1a** with calix[4]arene **2** (2.7·10-6 M in MeOH).

**Fig. 4** Molecular simulation (CHARMm 24.0) of the 1:1 ionic complex of calix[4]arene **2** and porphyrin **1** (alkyl groups on the nitrogens of **1** and on the oxygens of **2** have been set as methyl).

**Fig. 5** Van’t Hoff plot (243.1 to 298.2 K) for the formation of assembly **1a2** in MeOH. Concentrations used for these experiments are given in molality (m) and *K1:1* in m-1.

**Fig. 6** Effect of the presence of NaClO4 on the formation of assembly **1a2**.
